# Supplementary material
Source: PubMed Central journal article supplement (PMC4862497)
Supplement: AAC.00051-16_zac005165143so1.pdf [file AAC.00051-16_zac005165143so1.pdf]

1 **Table S1.** Listing of HCV replicons used to characterize pan-genotype potency of grazoprevir  
 2 and elbasvir

| Replicon Constructs                    | Accession Number                |                                         |                   |                   |                                  | References for Replicon Background |
|----------------------------------------|---------------------------------|-----------------------------------------|-------------------|-------------------|----------------------------------|------------------------------------|
|                                        | NS3/4A full length <sup>a</sup> | NS3 <sup>pro</sup> (1-181) <sup>b</sup> | NS4A <sup>c</sup> | NS5A <sup>d</sup> | Replicon Background <sup>e</sup> |                                    |
| GT1a(H77) FL <sup>f</sup>              | NC004102                        |                                         |                   | NC004102          | GT1a(H77)                        | (17)                               |
| GT1b (Con1) FL                         | AJ238799                        |                                         |                   | AJ238799          | GT1b (Con1)                      | (18)                               |
| GT2a (JFH-1) FL                        | AB047639                        |                                         |                   | AB047639          | GT2a (JFH-1)                     | (20)                               |
| GT2b(MD2b6-1) NS3 <sup>g</sup>         |                                 | AY232740                                | AY232740          |                   | GT2a (JFH-1)                     |                                    |
| GT2b(JPUT971017) NS5A <sup>g</sup> M31 |                                 |                                         |                   | AB030907          | GT2a (JFH-1)                     |                                    |
| GT2b(JPUT971017) NS5A M31L             |                                 |                                         |                   | AB030907          | GT2a (JFH-1)                     |                                    |
| GT3a(GLA) NS3                          |                                 | GU945445                                | GU945457.1        |                   | GT2a (JFH-1)                     |                                    |
| GT3a(S52) NS3                          |                                 | GU814263                                | GU814263          |                   | GT2a (JFH-1)                     |                                    |
| GT3a(S52) FL                           | GU814263                        |                                         |                   | GU814263          | GT3a(S52)                        | (21)                               |
| GT3a(NZL1) NS5A                        |                                 |                                         |                   | NC009824          | GT1b (Con1)                      |                                    |
| GT4a(ED43) FL                          | GU814265                        |                                         |                   | GU814265          | GT4a(ED43)                       | (21)                               |
| GT5a(SA13) NS3                         |                                 | AF064490                                | AF064490          |                   | GT2a (JFH-1)                     |                                    |
| GT5a(SA13) NS5A                        |                                 |                                         |                   | AF064490          | GT2a (JFH-1)                     |                                    |
| GT6a(HK6a) NS3                         |                                 | JN180455.1                              | JN180455.1        |                   | GT1b (N)                         | (19)                               |
| GT6a(GZ52557) NS3                      |                                 | DQ278892                                | DQ278892          |                   | GT2a (JFH-1)                     |                                    |
| GT6a(GZ52557) NS5A                     |                                 |                                         |                   | DQ278892          | GT2a (JFH-1)                     |                                    |

<sup>a</sup> NS3/4A full length: complete NS3 (aa 1-631) and NS4A genes from indicated sequence

<sup>b</sup> NS3pro: NS3 protease catalytic domain (aa 1-181)

<sup>c</sup> NS4A: complete NS4A gene from indicated sequence

<sup>d</sup> NS5A: complete NS5A gene from indicated sequence

<sup>e</sup> Replicon background: sequence of parental subgenomic replicon cDNA

<sup>f</sup> FL: full-length replicon of indicated genotype

<sup>g</sup> NS3 or NS5A: gene from indicated genotype introduced into chimeric genome

4 **Table S2.** Primer and probes sets for real-time RT-PCR of HCV RNA, by genotype  
5

|                                                                                                                 | Primer Sequence (5' to 3')        | Position on full-length virus sequence | Accession Number |
|-----------------------------------------------------------------------------------------------------------------|-----------------------------------|----------------------------------------|------------------|
| GT1a (primer/probe set from HCV IRES)                                                                           |                                   |                                        |                  |
| 1a F                                                                                                            | TGCGGAACCGGTGAGTACA               | 149-167                                | NC004102         |
| 1a R                                                                                                            | GCGGGTTTATCCAAGAAAGGA             | 191-211                                |                  |
| 1a probe                                                                                                        | 6FAM-CGGAATTGCCAGGACGACCGG-TAMRA  | 169-189                                |                  |
| GT1b, GT6a primer/probe set, 5B.2                                                                               |                                   |                                        |                  |
| Con1 F                                                                                                          | ATGGACAGGCGCCCTGA                 | 7613-7629                              | AJ238799         |
| Con1 R                                                                                                          | TTGATGGGCAGCTTGGTTTC              | 7650-7669                              |                  |
| Con1 Probe                                                                                                      | 6FAM-CACGCCATGCGCTGCGG-TAMRA      | 7631-7647                              |                  |
| GT2a, GT2b, GT5a primer/probe set IRES                                                                          |                                   |                                        |                  |
| JFH F                                                                                                           | CGCAAGACTGCTAGCCGAG               | 237-255                                | AB047639         |
| JFH R                                                                                                           | GCCCTATCAGGCAGTACCACA             | 279-299                                |                  |
| JFH Probe                                                                                                       | 6FAM-AGCGTTGGGTTGCGAAAGGCC-TAMRA  | 257-277                                |                  |
| GT3a primer/probe set IRES                                                                                      |                                   |                                        |                  |
| S52 F                                                                                                           | TGCGGAACCGGTGAGTACA               | 147-165                                | GU814263         |
| S52 R                                                                                                           | GCGGGTTGCTCCAAGAAAGGA             | 189-209                                |                  |
| S52 Probe                                                                                                       | 6FAM-CGGAATCGCTGGGGTGACCGG-TAMRA  | 167-187                                |                  |
| GT4a primer/probe set 5B                                                                                        |                                   |                                        |                  |
| ED43 F                                                                                                          | TGAGAGCGACGGCGTAGAG               | 8563-8581                              | GU814265         |
| ED43 R                                                                                                          | ATCTCGTCATAGCCTCCGTGAA            | 8606-8627                              |                  |
| ED43 Probe                                                                                                      | 6FAM-AGGACAACCGAGCCCTCCGAGC-TAMRA | 8583-8604                              |                  |
| Program: 48° C for 30 minutes, 95° C for 10 minutes, and 40 cycles of 95° C for 15 seconds, 60° C for 1 minute. |                                   |                                        |                  |

6

7 **Table S3.** Summary of clonal variants found from untreated (DMSO) control GT1a(H77)  
 8 replicons

9 **A. NS3 protease domain**

AA

| NS3     | C  | D  | V  | A  | Q  | Q  | G   | S   | R   | A   | L   | Y   | R   | A   | D   | I   | N   |
|---------|----|----|----|----|----|----|-----|-----|-----|-----|-----|-----|-----|-----|-----|-----|-----|
| DMSO    | 16 | 25 | 33 | 39 | 41 | 89 | 100 | 101 | 109 | 111 | 127 | 134 | 155 | 156 | 168 | 170 | 174 |
| AA1     | C  | D  | V  | A  | R  | Q  | G   | S   | R   | T   | L   | Y   | R   | A   | D   | I   | S   |
| AA10    | C  | D  | V  | A  | R  | Q  | G   | S   | R   | T   | L   | Y   | R   | A   | D   | I   | S   |
| AA3     | C  | D  | V  | A  | R  | Q  | G   | S   | R   | A   | L   | Y   | R   | A   | D   | I   | S   |
| AA9     | C  | D  | V  | A  | R  | Q  | G   | S   | R   | A   | L   | Y   | R   | A   | D   | I   | S   |
| AA6     | C  | D  | G  | A  | R  | Q  | G   | S   | R   | A   | L   | Y   | R   | A   | D   | I   | S   |
| 41-1791 | C  | D  | V  | A  | R  | Q  | S   | S   | R   | A   | L   | Y   | R   | A   | D   | I   | S   |
| 41-1788 | C  | D  | V  | A  | R  | Q  | G   | S   | R   | A   | L   | Y   | R   | A   | D   | I   | S   |
| 41-1546 | C  | D  | V  | A  | R  | Q  | G   | S   | R   | A   | P   | Y   | R   | A   | D   | I   | S   |
| 41-6    | C  | D  | V  | A  | R  | Q  | G   | S   | R   | A   | P   | Y   | R   | A   | D   | I   | S   |
| 41-32   | C  | D  | V  | A  | R  | Q  | G   | S   | R   | A   | L   | Y   | R   | A   | D   | I   | S   |
| 41-34   | C  | D  | V  | A  | R  | Q  | G   | P   | G   | A   | L   | Y   | R   | A   | D   | I   | S   |
| 41-1549 | R  | D  | V  | A  | Q  | Q  | G   | S   | R   | A   | L   | Y   | R   | A   | D   | I   | S   |
| 41-1551 | C  | G  | V  | A  | Q  | Q  | G   | S   | R   | A   | L   | Y   | R   | A   | D   | I   | S   |
| 41-19   | C  | D  | V  | A  | Q  | Q  | G   | S   | R   | A   | L   | Y   | R   | A   | D   | I   | S   |
| 41-1548 | C  | D  | V  | A  | Q  | Q  | G   | S   | R   | A   | L   | Y   | R   | A   | D   | I   | S   |
| 41-1789 | C  | D  | V  | A  | Q  | Q  | G   | S   | R   | A   | L   | Y   | R   | A   | D   | I   | S   |
| 41-37   | C  | D  | V  | A  | Q  | Q  | G   | S   | R   | A   | L   | Y   | R   | A   | D   | I   | S   |
| AA8     | C  | D  | V  | T  | Q  | Q  | G   | S   | R   | A   | L   | H   | R   | A   | D   | I   | N   |
| 41-11   | C  | D  | V  | A  | Q  | Q  | G   | S   | R   | V   | L   | Y   | R   | A   | D   | I   | N   |
| 41-1787 | C  | D  | V  | A  | Q  | R  | G   | S   | R   | A   | L   | Y   | R   | A   | D   | I   | N   |

10

11

12 **B. NS5A Domain I**

| NS5A    | <i>I</i> | <i>E</i> | <i>K</i> | <i>M</i> | <i>Q</i> | <i>L</i> | <i>I</i> | <i>T</i> | <i>H</i> | <i>S</i> | <i>Y</i> |
|---------|----------|----------|----------|----------|----------|----------|----------|----------|----------|----------|----------|
| DMSO    | 12       | 14       | 24       | 28       | 30       | 31       | 52       | 55       | 58       | 85       | 93       |
| AA1     | I        | E        | K        | M        | Q        | L        | I        | T        | H        | S        | Y        |
| AA10    | I        | E        | K        | M        | Q        | L        | I        | T        | H        | S        | Y        |
| AA3     | I        | E        | K        | M        | Q        | L        | I        | T        | H        | S        | Y        |
| AA9     | I        | E        | K        | M        | Q        | L        | I        | T        | H        | S        | Y        |
| AA6     | I        | E        | K        | M        | Q        | L        | I        | T        | R        | G        | Y        |
| 41-1791 | I        | E        | K        | M        | Q        | L        | I        | T        | H        | S        | Y        |
| 41-1788 | I        | E        | K        | M        | Q        | L        | I        | T        | H        | S        | Y        |
| 41-1546 | I        | E        | K        | M        | Q        | L        | I        | T        | H        | S        | Y        |
| 41-6    | I        | E        | K        | M        | Q        | L        | I        | T        | H        | S        | Y        |
| 41-32   | I        | E        | K        | M        | Q        | L        | V        | T        | H        | S        | Y        |
| 41-34   | I        | E        | K        | M        | Q        | L        | I        | T        | H        | S        | Y        |
| 41-1549 | I        | E        | Q        | M        | Q        | L        | I        | T        | H        | S        | Y        |
| 41-1551 | T        | E        | K        | M        | Q        | L        | I        | T        | H        | S        | Y        |
| 41-19   | I        | E        | K        | M        | Q        | L        | I        | T        | H        | S        | Y        |
| 41-1548 | I        | E        | K        | M        | Q        | L        | I        | T        | H        | S        | Y        |
| 41-1789 | I        | E        | K        | M        | Q        | L        | I        | T        | H        | S        | Y        |
| 41-37   | I        | E        | K        | M        | Q        | L        | I        | T        | H        | S        | Y        |
| AA8     | I        | E        | K        | M        | Q        | L        | I        | A        | H        | S        | Y        |
| 41-11   | I        | E        | K        | M        | Q        | L        | I        | A        | H        | S        | Y        |
| 41-1787 | I        | E        | K        | M        | Q        | L        | I        | T        | H        | S        | Y        |

13

14 Red letters highlight variations from the sequence template used for alignments (listed at the top of each column). If  
 15 the sequence was not different from the template, it was not included (exception: key RAVs, highlighted in yellow).  
 16 The gene and treatment type are denoted in the upper left corner of each table. Each row starts with the name for a  
 17 sequenced cDNA clone spanning the NS3 to NS5B polyprotein gene.

18 **Table S4.** Variants selected by elbasvir at different EC<sub>90</sub> multiples in GT1a(H77) replicon cells

19

| Treatment (EC <sub>90</sub> Multiples) | EBR-selected NS5A variants                                                                                                                                                                   |
|----------------------------------------|----------------------------------------------------------------------------------------------------------------------------------------------------------------------------------------------|
| 1X [5 clones]                          | Q30R+R81M (60%)<br>K24E+Q30R (40%)                                                                                                                                                           |
| 3X [15 clones]                         | M28T (20%)<br>Q30E (6.7%)<br>Q30R (13.3%)<br>Y93C (33.3%)<br>K24T+Q30R (6.7%)<br>K24T+M28T+Q30R (6.7%)<br>M28T+Q30H (6.7%)<br>Q30R+Y93H (6.7%)                                               |
| 10X [18 clones]                        | Q30R (5.6%)<br>L31V (22.2%)<br>Y93H (5.6%)<br>K24E+Q30R (5.6%)<br>K24E+L31V (5.6%)<br>K24Q+Y93H (5.6%)<br>K24R+Y93C (5.6%)<br>K24T+Q30R (33.3%)<br>K24T+Y93H (5.6%)<br>K24Q+M28I+L31M (5.6%) |
| 30X [11 clones]                        | Q30E (9.1%)<br>L31V (9.1%)<br>Y93H (18.2%)<br>K24A+Q30R (9.1%)<br>K24T+Q30R (36.4%)<br>M28T+Q30R (18.2%)                                                                                     |
| 100X [4 clones]                        | Y93N (100%)                                                                                                                                                                                  |
| 1000X [5 clones]                       | K24I+M28K (40%)<br>Q30R+L31V (60%)                                                                                                                                                           |

20 The percentage (in parentheses) indicates the frequency of that variant among the clones  
 21 sequenced for that dose level.

22

23

24

25 Tables S5 and S6 show results of clonal sequencing, in a format that organizes linkage of NS3<sup>pro</sup>  
 26 and NS5A  
 27

28 **Table S5.** Amino Acid Variants found in Combination Therapy Groups with 1x EC<sub>90</sub>  
 29 Grazoprevir

| Treatment Multiple              | GZR-selected NS3 variants | EBR-selected NS5A variants | Frequency (%) |
|---------------------------------|---------------------------|----------------------------|---------------|
| 1X GZR – 0X EBR<br>[10 clones]  | wt                        | wt                         | 10            |
|                                 | Q41R                      | wt                         | 30            |
|                                 | R155K                     | wt                         | 10            |
|                                 | Q41R                      | K24T                       | 30            |
|                                 | Q41R+R155K                | wt                         | 10            |
|                                 | Q41R+D168E                | wt                         | 10            |
| 1X GZR – 1X EBR<br>[14 clones]  | Q41R                      | Q30G                       | 7.1           |
|                                 | R109K                     | Q30R                       | 14.3          |
|                                 | R109K                     | K24E+Q30R                  | 7.1           |
|                                 | Q41R+R109K                | Q30R                       | 50            |
|                                 | Q41R+R109K                | K24E+Q30R                  | 14.3          |
|                                 | Q41R+R109K                | L31V                       | 7.1           |
| 1X GZR – 3X EBR<br>[9 clones]   | Q41R                      | L31M                       | 44.4          |
|                                 | Q41R                      | M28K+L31M                  | 11.1          |
|                                 | Q41R                      | K24T+Q30R                  | 22.2          |
|                                 | Q41R                      | K24R+L31M                  | 11.1          |
|                                 | Q41R_R155K                | L31M+Y93C                  | 11.1          |
| 1X GZR – 10X EBR<br>[19 clones] | Q41R                      | M28T                       | 10.5          |
|                                 | Q41R                      | Q30E                       | 5.3           |
|                                 | Q41R                      | Q30D                       | 5.3           |
|                                 | Q41R                      | K24T+Q30R                  | 10.5          |
|                                 | Q41R                      | M28T+Y93C                  | 5.3           |
|                                 | D168A+N174E               | wt                         | 26.3          |
|                                 | D168A+N174E               | M28K                       | 5.3           |
|                                 | Q41R+R109K+N174E          | K24E+Q30R                  | 26.3          |
|                                 | Q41R+R109K+N174E          | K24T+Q30R                  | 5.3           |
| 1X GZR – 100X EBR<br>[3 clones] | R109K                     | K24G+Q30R                  | 33.3          |
|                                 | R109K                     | K24R+Q30E                  | 66.7          |

30 The percentage (in parentheses) indicates the frequency of that variant among the clones  
 31 sequenced for that dose level.

32

33 **Table S6.** Amino Acid Variants found in Combination Therapy Groups with Higher EC<sub>90</sub>  
 34 Multiples of Grazoprevir

| Treatment Multiple              | GZR-selected NS3 variants | EBR-selected NS5A variants | Frequency (%) |
|---------------------------------|---------------------------|----------------------------|---------------|
| 3X GZR – 3X EBR<br>[13 clones]  | Q41R+R155K                | Q30D                       | 7.7           |
|                                 | Q41R+R155K                | K24T+Q30R                  | 23.1          |
|                                 | Q41R+D168E                | K24T+Q30R                  | 7.7           |
|                                 | Q41R+D168E                | Q30D                       | 38.5          |
|                                 | Q41R+D168E                | M28V                       | 15.4          |
|                                 | Q41R+D168E                | K24T+M28T+Q30R             | 7.7           |
| 10X GZR – 0X EBR<br>[1 clone]   | D168A                     | wt                         | 100           |
| 10X GZR – 1X EBR<br>[14 clones] | D168E                     | Q30H                       | 7.1           |
|                                 | D168V                     | Q30H                       | 78.6          |
|                                 | D168S                     | K24R+Q30H                  | 7.1           |
|                                 | D168V                     | K24R+Q30H                  | 7.1           |

35 The percentage (in parentheses) indicates the frequency of that variant among the clones  
 36 sequenced for that dose level.
